# Supplementary material for: Totipotent Embryonic Stem Cells Arise in Ground-State Culture Conditions
Source: PubMed Central journal article supplement — Cell Rep. 2013 Jun 27;3(6):1945–57. doi: 10.1016/j.celrep.2013.04.034 (PMC3701323; doi:10.1016/j.celrep.2013.04.034), 2013-06-27
Supplement: mmc3.pdf [file mmc3.pdf]

**Table S3. Antibody Details**

|                  | <b>Antibody</b>  | <b>Source</b>    | <b>Cat. no.</b> | <b>Dilution (1:)</b> |
|------------------|------------------|------------------|-----------------|----------------------|
| <b>Primary</b>   | Brachyury        | R&D              | AF2085          | 200                  |
|                  | Cdx2             | Biogenex         | MU392A-UC       | 200                  |
|                  | Cytokeratin7     | Santa Cruz       | sc70936         | 200                  |
|                  | pERK XP          | Cell Signalling  | 4370            | 1000                 |
|                  | tERK             | Cell Signalling  | 9102            | 1000                 |
|                  | Gata6            | R&D              | AF1700          | 100                  |
|                  | GFP Alexa488     | Molecular probes | A21311          | 100                  |
|                  | Ki67 Alexa647    | eBioscience      | 51-5698         | 200                  |
|                  | Nanog            | eBioscience      | 14-5761         | 200                  |
|                  | PDFR $\alpha$ PE | eBioscience      | 14-1401         | 200                  |
|                  | Tubulin          | Abcam            | ab6160          | 5000                 |
|                  | Tuj1             | Covance          | MMS-435P        | 1000                 |
| <b>Secondary</b> | Alexa fluors     | Molecular probes |                 | 800                  |
| <b>Nuclear</b>   | DAPI             | Molecular probes | D1306           | 0.1 $\mu$ g/ml       |

**Table S4. qRT-PCR Primer Sequences**

| <b>Gene</b>          | <b>Forward Primer 5'-3'</b> | <b>Reverse Primer 5'-3'</b> |
|----------------------|-----------------------------|-----------------------------|
| <b>AFP</b>           | CATGCTGCAAAGCTGACAA         | CTTTGCAATGGATGCTCTCTT       |
| <b>Brachyury UPL</b> | CAGCCCACCTACTGGCTCTA        | GAGCCTGGGGTGATGGTA          |
| <b>Calcr</b>         | ACATGATCCAGTTCACCAGGCAGA    | AGGTTCTTGGTGACCTCCCACTT     |
| <b>Cdx2</b>          | GGAAGCCAAGTGAAAACCAG        | CTTGGCTCTGCGGTTCTG          |
| <b>Dab2</b>          | GGAAGCTTACATTGCGCTTT        | CTGGTCTCCGTATTGGCTAAA       |
| <b>Fgf4</b>          | CCGGTCTTCGTGGCTATGA         | CTTACTGAGGGCCATGAACAT       |
| <b>FoxA2</b>         | CATCCGACTGGAGCAGCTA         | GCGCCCACATAGGATGAC          |
| <b>FoxA2 UPL</b>     | GAGCAGCAACATCACCACAG        | CGTAGGCCTTGAGGTCCAT         |
| <b>Gata4</b>         | GCCTGCGGCCTCTACATGAA        | CAGGACCTGGCGTCTTA           |
| <b>Gata4 UPL</b>     | TTCGCTGTTTCTCCCTCAAG        | CAATGTTAACGGGTTGTGGA        |
| <b>Gata6</b>         | GGTCTCTACAGCAAGATGAATGG     | GGTCTCTACAGCAAGATGAATGG     |
| <b>Gata6 UPL</b>     | GGTCTCTACAGCAAGATGAATGG     | TGGCACAGGACAGTCCAAG         |
| <b>Gdf3</b>          | TTCAGCTTCTCCAGACCAG         | CAAGTTAAAATAGAGGACCTTCTGGA  |
| <b>Gsc UPL</b>       | GAGACGAAGTACCCAGACGTG       | GGCGGTTCTTAAACCAGACC        |
| <b>Hex</b>           | CTACACGCACGCCCTACTC         | CAGAGGTCGCTGGAGGAA          |
| <b>Hex UPL</b>       | TCAGAATCGCCGACTAAAT         | GTCCAACGCATCCTTTTTGT        |
| <b>HNF4a</b>         | CTTGGCTCTGCGGTTCTG          | CCGAGGGACGATGTAGTCAT        |
| <b>Klf4 UPL</b>      | CGGGAAGGGAGAAGACT           | GAGTTCCTCACGCCAACG          |
| <b>Krt7</b>          | ACCCTCAACAACAAATTCGCGTCC    | TGCTCTTGGCTGACTTCTGTTCTT    |
| <b>Meg3</b>          | TGGTGGTTAACATGGTGGGAGGAA    | ATGGTGACTGTGTGCTCTGTGACT    |
| <b>Mirg</b>          | TCTCGCTTACGACAACCGACAACA    | TTCCTAAGCAAGGGCTGCTCAGAT    |
| <b>Myc</b>           | CCTAGTGCTGCATGAGGAGA        | TCTTCCTCATCTTCTTGCTCTTC     |
| <b>Nanog</b>         | ATGAAGTGCAAGCGGTGGCAGAAA    | CCTGGTGGAGTCACAGAGTAGTTC    |
| <b>Nestin UPL</b>    | CTGCAGGCCACTGAAAAGT         | TTCCAGGATCTGAGCGATCT        |
| <b>NeuroD1 UPL</b>   | CGCAGAAGGCAAGGTGTC          | TTTGGTCATGTTTCCACTTCC       |
| <b>NeuroD3 UPL</b>   | CCTTCTTTGTGACTGGCTCA        | CCCTTTTCCAACCACACTG         |
| <b>Ngn2 UPL</b>      | ACATCTGGAGCCGCGTAG          | CCCAGCAGCATCAGTACCTC        |
| <b>Nnat</b>          | ATATGGGCGTAGGCACCACATTCT    | ATGTAGGGCTTCAGCTGGTGATGT    |
| <b>Oct4</b>          | GGCGTTCTCTTTGGAAAGGTGTTT    | CTCGAACCACATCCTTCTCT        |
| <b>Rex1</b>          | TCTTCTCTCAATAGAGTGAGTGTGC   | CCAGGACAGCTCAGGATACAG       |
| <b>Rian</b>          | TGAGATTCCTGCTCTGGTGGTTGT    | TGCTGATAACAGAGTGCAGGAGCA    |
| <b>Serpine2</b>      | TCAAGGGTTTGTGGAAGTCTCGGT    | AGAGCTGAGCCAACATGGGTAFTT    |
| <b>Sox2</b>          | GGCGGCAACCAGAAGAACAG        | GCTTGGCCTCGTCGATGAAC        |
| <b>Stella</b>        | GATGCACAACGATCCAGATTT       | TGGAAATTAGAACGTACATACTCCA   |
| <b>TBP</b>           | GGGGAGCTGTGATGTGAAGT        | CCAGGAAATAATTCTGGCTCA       |
| <b>TBP UPL</b>       | GGGGAGCTGTGATGTGAAGT        | CCAGGAAATAATTCTGGCTCA       |
| <b>Tead4</b>         | TCAGCCAGGCATATCACCAAGACA    | AGCCTTCTGCAGTAGCCATTCTCA    |
| <b>Utf1</b>          | GTCCCTCTCCGCGTTAGC          | GGGGCAGGTTTCGTCATTT         |

**Table S5. Single-Cell qRT-PCR DELTAgene Assay Sequences**

| <b>Gene</b>     | <b>Forward Primer</b> | <b>Reverse Primer</b> |
|-----------------|-----------------------|-----------------------|
| <b>ACTB</b>     | CCCTAAGGCCAACCGTGAAA  | CAGCCTGGATGGCTACGTAC  |
| <b>Dlk1</b>     | ATGGATTCTGCGAGGCTGAC  | GGGGCAGTTACACACTTGTC  |
| <b>Eomes</b>    | GCGGCAAAGCGGACAATAAC  | ATCCAGTGGGAGCCAGTGTTA |
| <b>GAPDH</b>    | AGACGGCCGCATCTTCTT    | TTCACACCGACCTTCACCAT  |
| <b>Gata3</b>    | CCTACCGGGTTTCGGATGTAA | CCGCAGTTCACACACTCC    |
| <b>Klf4</b>     | CAGGCTGTGGCAAACCTATAC | CGTCCCAGTCACAGTGGTAA  |
| <b>Nanog</b>    | TCTGGGAACGCCTCATCAA   | GAGGCAGGTCTTCAGAGGAA  |
| <b>Oct4</b>     | TCCCTACAGCAGATCACTCAC | CGCCGGTTACAGAACCATAC  |
| <b>Serpine2</b> | CTCTGCCTCTGAGTCCATCA  | CGATCAGATTTGGGGAAAGCA |
| <b>Sox2</b>     | TGAAGGAGCACCCGGATTATA | CGGGAAGCGTGTACTTATCC  |
| <b>Stella</b>   | TGAAGAGGACGCTTTGGATGA | CCGGGGTTTAGGGTTAGCTT  |
| <b>Tcfap2a</b>  | CCAATGAGCAAGTGCAAGAAA | GAGCCAGCAGGTCAGTGAA   |
